# Supplementary material for: Running Marathons in High School: A 5-Year Review of Injury in a Structured Training Program
Source: MDPI journal article supplement (doi:10.3390/ijerph20054426), 2023-03-01
Supplement: s1 [file s1]

**Supplemental Table S1.** Sample training schedule

| Week<br>number                  | Weekday Runs (2 days per week) <sup>‡</sup> |         | Long Run<br>(miles) |
|---------------------------------|---------------------------------------------|---------|---------------------|
|                                 | miles                                       | minutes |                     |
| 1 – 5                           | 1 – 2.5                                     | 10 – 35 | 0                   |
| 6 – 10*                         | 2 - 4                                       | 25 - 50 | 4 - 6               |
| 11 – 15                         | 2.5 - 5                                     | 30 - 60 | 6 – 10              |
| 16 – 20*                        | 3 - 6                                       | 35 - 60 | 10 - 14             |
| 21 – 27*                        | 3 - 7                                       | 35 - 75 | 14 - 20             |
| 28 – 30 <sup>#</sup><br>(taper) | 3 - 5                                       | 35 - 50 | 8 - 12              |

\*Includes participation in an organized road race: 5K (week 6-10), 10K (week 16-20), half-marathon (week 21-27)

<sup>#</sup>Full marathon at the end of week 30

<sup>‡</sup>A third training day is scheduled each week that consists of a strength training program co-designed by the team's coach and physical therapist
